# Supplementary material for: The development and validation of the Inhomogeneous Wind Scheme for Urban Street (IWSUS-v1)
Source: Copernicus journal article supplement (doi:10.5194/gmd-16-4385-2023), 2023-08-01
Supplement: Supplementary file 1 [file gmd-16-4385-2023-supplement.zip]

Archive with 3 entries (3 files):
- Supplement.docx
- figures_in_supplement.zip
- gmd-16-4385-2023-supplement-title-page.pdf
