# Supplementary material for: The development and validation of the Inhomogeneous Wind Scheme for Urban Street (IWSUS-v1)
Source: Copernicus journal article supplement (doi:10.5194/gmd-16-4385-2023), 2023-08-01
Supplement: Supplementary file 1 [file gmd-16-4385-2023-supplement.zip › gmd-16-4385-2023-supplement-title-page.pdf]

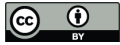

*Supplement of*

## **The development and validation of the Inhomogeneous Wind Scheme for Urban Street (IWSUS-v1)**

**Zhenxin Liu et al.**

*Correspondence to:* Zhenxin Liu ([liuzhenxin@nuist.edu.cn](mailto:liuzhenxin@nuist.edu.cn))

- [gmd-16-4385-2023-supplement-title-page.pdf](#)
- [Supplement.docx](#)
- [figures\\_in\\_supplement.zip](#)

The copyright of individual parts of the supplement might differ from the article licence.
