# Supplementary material for: The development and validation of the Inhomogeneous Wind Scheme for Urban Street (IWSUS-v1)
Source: Copernicus journal article supplement (doi:10.5194/gmd-16-4385-2023), 2023-08-01
Supplement: Supplementary file 1 [file gmd-16-4385-2023-supplement.zip › Supplement.docx]

Supplement

# Piecewise fitting of perpendicular scenarios

The fitting horizontal components have been mentioned in the essay. Here, the endpoints and expressions of vertical component w is shown from Table S1 to Table S3. Figure S1 shows the vertical profile of w components from IWSUS.

Table S The fitting functions of the segmentation points for the wind components *w* in the perpendicular scenarios

| Positions | Segmentation Points | | Fitting Functions |
| --- | --- | --- | --- |
| leeward at entrance/exit | H1 |  | |
| H2 |  | |
| H3 |  | |
| windward at entrance/exit | H1 |  | |
| H2 |  | |
| leeward at middle | H1 |  | |
| H2 |  | |
| H3 |  | |
| windward at middle | H1 |  | |
| H2 |  | |
| H3 |  | |

Table S The fitting functions of the wind components *w* at the segmentation points (Hi) in the perpendicular scenarios

| Positions | Segmentation Points | Fitting Functions |
| --- | --- | --- |
| leeward at entrance/exit | H1 |  |
| H2 |  |
| H3 |  |
| windward at entrance/exit | H1 |  |
| H2 |  |
| leeward at middle | H1 |  |
| H2 |  |
| H3 |  |
| windward at middle | H1 |  |
| H2 |  |
| H3 |  |

Table S Expressions of *w* component vertical profile for perpendicular scenarios, where the functional relations between wr and hr and determine functions of coefficients in these expressions are listed. The Hi and wr(Hi) represents the relative height and relative wind components speed at the endpoints determined by Table S1 and Table S2 respectively.

| Positions | Wind profile Functions | Formula for Coefficients in Wind profile Functions |
| --- | --- | --- |
| leeward at entrance/exit |  |  |
| windward at entrance/exit |  |  |
| leeward at middle |  |  |
| windward at middle |  |  |


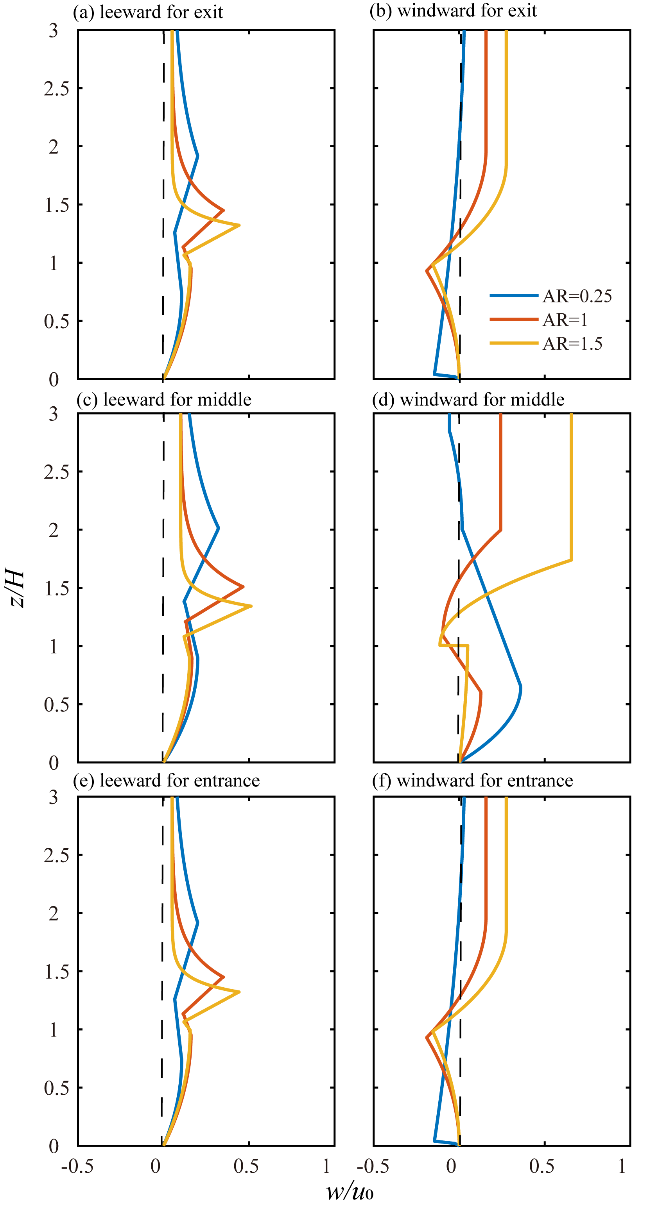


Figure S Wind profile of *w* component obtained from IWSUS for perpendicular scenarios at different positions with AR= 0.25, 1 and 1.5.

# Piecewise fitting of parallel scenarios

The endpoints and expressions of component *u* vertical profile in parallel scenarios are shown from Table S4 to Table S6. Figure S2 shows the vertical profile of w components from IWSUS. For *v* component, the results are shown from Table S7 to Table S9 and Figure S3. For *w* components, the results are shown from Table S10 to Table S12 and Figure S4.

Table S The fitting functions of the segmentation points for the wind components *u* in the parallel scenarios

| Positions | Segmentation Points | Fitting Functions |
| --- | --- | --- |
| Leeward/windward at entrance | H1 |  |
| H2 |  |
| Leeward/windward at middle | H1 |  |
| Leeward/windward at exit | H1 |  |

Table S The fitting functions of the wind components *u* at the segmentation points (Hi) in the parallel scenarios

| Positions | Segmentation Points | Fitting Functions |
| --- | --- | --- |
| windward at entrance | H1 |  |
| H2 |  |
| windward at middle | H1 |  |
| windward at exit | H1 |  |
| leeward at entrance | H1 |  |
| H2 |  |
| leeward at middle | H1 |  |
| leeward at exit | H1 |  |

Table S Expressions of *u* component vertical profile for parallel scenarios, where the functional relations between ur and hr and determine functions of coefficients in these expressions are listed. The Hi and ur(Hi) represents the relative height and relative wind components speed at the endpoints determined by Table S4 and Table S5 respectively.

| Positions | Wind profile Functions | Formula for Coefficients in Wind profile Functions |
| --- | --- | --- |
| windward at entrance |  |  |
| windward at middle |  |  |
| windward at exit |  |  |
| leeward at entrance |  |  |
| leeward at middle |  |  |
| leeward at exit |  |  |


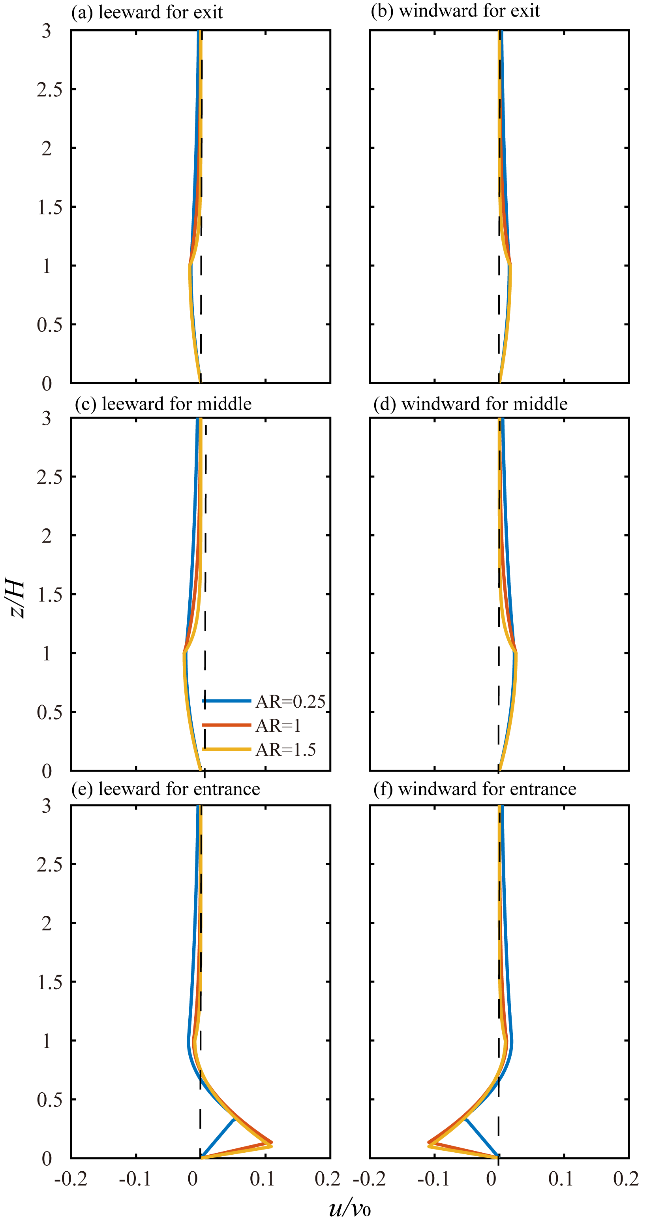


Figure S Wind profile of *u* component obtained from IWSUS at different positions for parallel scenarios with AR= 0.25, 1 and 1.5.

Table S The fitting functions of the segmentation points for the wind components *v* in the parallel scenarios

| Positions | Segmentation Points | Fitting Functions |
| --- | --- | --- |
| Leeward/windward at entrance | H1 |  |
| H2 |  |
| Leeward/windward at middle | H1 |  |
| H2 |  |
| Leeward/windward at exit | H1 |  |
| H2 |  |

Table S The fitting functions of the wind components *v* at the segmentation points (Hi) in the parallel scenarios

| Positions | Segmentation Points | Fitting Functions |
| --- | --- | --- |
| Leeward/windward at entrance | H1 |  |
| H2 |  |
| Leeward/windward at middle | H1 |  |
| H2 |  |
| Leeward/windward at exit | H1 |  |
| H2 |  |

Table S Expressions of v component vertical profile for parallel scenarios, where the functional relations between vr and hr and determine functions of coefficients in these expressions are listed. The Hi and vr(Hi) represents the relative height and relative .wind components speed at the endpoints determined by Table S7 and Table S8 respectively.

| Positions | Wind profile Functions | Formula for Coefficients in Wind profile Functions |
| --- | --- | --- |
| Leeward/windward at entrance |  |  |
| Leeward/windward at middle |  |  |
| Leeward/windward at exit |  |  |


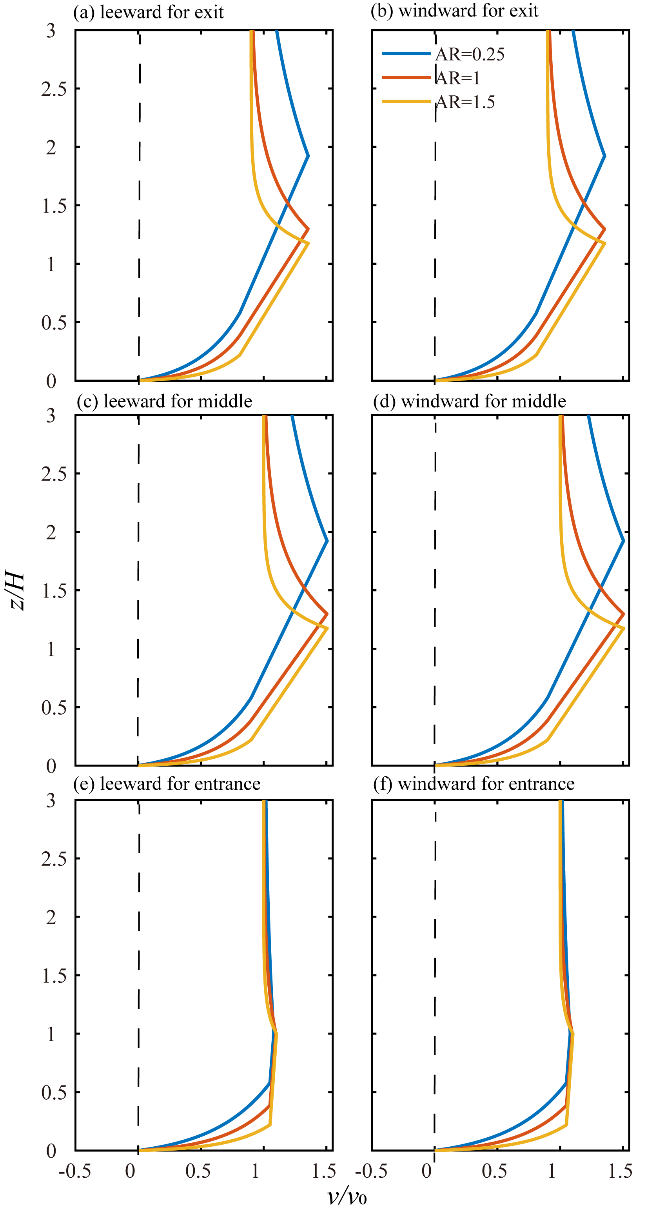


Figure S Wind profile of *v* component obtained from IWSUS at different positions for parallel scenarios with AR= 0.25, 1 and 1.5.

Table S The fitting functions of the segmentation points for the wind components *w* in the parallel scenarios

| Positions | Endpoints | fitting function |
| --- | --- | --- |
| Leeward/windward at entrance | H1 |  |
| Leeward/windward at middle | H1 |  |
| H2 |  |
| Leeward/windward at exit | H1 |  |
| H2 |  |

Table S The fitting functions of the wind components *w* at the Hi positions in the parallel scenarios

| Positions | Endpoints | fitting function |
| --- | --- | --- |
| Leeward/windward at entrance | H1 |  |
| Leeward/windward at middle | H1 |  |
| H2 |  |
| Leeward/windward at exit | H1 |  |
| H2 |  |

Table S Expressions of *w*component vertical profile for perpendicular scenarios, where the functional relations between wr and hr and determine functions of coefficients in these expressions are listed. The Hi and wr(Hi) represents the relative height and relative wind components speed at the endpoints determined by Table S10 and Table S11 respectively.

| Positions | Wind profile Functions | Formula for Coefficients in Wind profile Functions |
| --- | --- | --- |
| Leeward/windward at entrance |  |  |
| Leeward/windward at middle |  |  |
| Leeward/windward at exit |  |  |


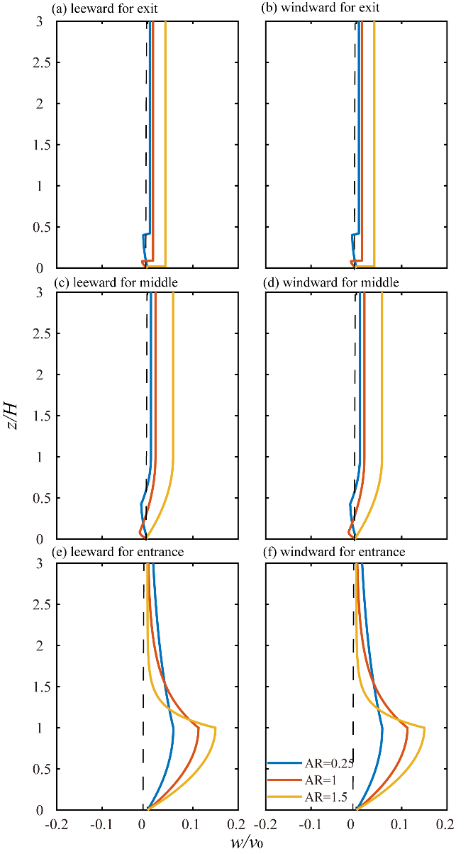


Figure S Wind profile of *w* component obtained from IWSUS at different positions for parallel scenarios with AR= 0.25, 1 and 1.5.
